# Supplementary material
Source: publisher figshare collection journal article supplement (https://tandf.figshare.com/articles/dataset/_/6632903)
Supplement: Supplementary file 1 [file 2]

Supplementary Table 1a. Neonatal complications of prematurity - spontaneous vs. medically indicated late preterm delivery

| <b>Variable</b>                           | <b>Spontaneous<br/>(N=10,063 Deliveries)</b> | <b>Medically Indicated<br/>(N=4,833 Deliveries)</b> | <b>P value</b> |
|-------------------------------------------|----------------------------------------------|-----------------------------------------------------|----------------|
| <b>Respiratory distress syndrome</b>      | 2.5 (225)                                    | 2.9 (131)                                           | 0.111          |
| <b>Intra ventricular hemorrhage</b>       | 0.1 (6)                                      | 0.1 (5)                                             | 0.357          |
| <b>Necrotizing enterocolitis</b>          | 0.1 (9)                                      | 0.2 (11)                                            | 0.035          |
| <b>Bronchopulmonary dysplasia</b>         | 0.0 (0)                                      | 0.0 (0)                                             | 0.329          |
| <b>Retinopathy of prematurity</b>         | 0.0 (0)                                      | 0.0 (1)                                             | 0.329          |
| <b>Transitory tachypnea</b>               | 7.8 (711)                                    | 7.4 (329)                                           | 0.372          |
| <b>Polycythemia neonatorum</b>            | 1.5 (140)                                    | 1.5 (65)                                            | 0.718          |
| <b>Infant of diabetic mother syndrome</b> | 0.6 (50)                                     | 0.8 (37)                                            | 0.055          |

Data is presented as percentage (number)

Supplementary Table 1b. Severe neonatal outcomes - spontaneous vs. medically indicated late preterm delivery

| <b>Variable</b>                | <b>Spontaneous<br/>(N=10,063 Deliveries)</b> | <b>Medically Indicated<br/>(N=4,833 Deliveries)</b> | <b>P value</b> |
|--------------------------------|----------------------------------------------|-----------------------------------------------------|----------------|
| <b>Intrapartum death</b>       | 0.1 (14)                                     | 0.1 (5)                                             | 0.568          |
| <b>Postpartum death</b>        | 1 (104)                                      | 0 (48)                                              | 0.891          |
| <b>Umbilical cord Ph &lt;7</b> | 0.6 (3)                                      | 1 (2)                                               | 0.625          |
| <b>Hemorrhage</b>              | 0.0 (1)                                      | 0.0 (2)                                             | 0.253          |
| <b>Cardiogenic shock</b>       | 0.0 (1)                                      | 0.0 (0)                                             | 1              |
| <b>Hemolytic disorder</b>      | 0.5 (48)                                     | 0.3 (13)                                            | 0.054          |

Data is presented as percentage (number)

Supplementary Table 1c. Infection-related neonatal outcomes - spontaneous vs. medically indicated late preterm delivery

| <b>Variable</b>                 | <b>Spontaneous<br/>(N=10,063 Deliveries)</b> | <b>Medically Indicated<br/>(N=4,833 Deliveries)</b> | <b>P value</b> |
|---------------------------------|----------------------------------------------|-----------------------------------------------------|----------------|
| <b>Infection</b>                | 0.0 (4)                                      | 0.0 (2)                                             | 1              |
| <b>Bacteremia</b>               | 0.0 (2)                                      | 0.0 (0)                                             | 1              |
| <b>Fever</b>                    | 0.1 (9)                                      | 0.0 (2)                                             | 0.522          |
| <b>Urinary tract infections</b> | 0.1 (7)                                      | 0.1 (3)                                             | 1              |
| <b>Antibiotics transfusion</b>  | 13.6 (1,237)                                 | 13.8 (621)                                          | 0.655          |

Data is presented as percentage (number)

Supplementary Table 2. The risk for neonatal distress\* in late preterm delivery

| <b>Variable</b>         | <b>Crude OR (95%CI)</b> |
|-------------------------|-------------------------|
| <b>Maternal age</b>     | 1.018 (1.009-1.027)     |
| <b>Induced delivery</b> | 0.969 (0.857-1.096)     |
| <b>Male gender</b>      | 1.447 (1.288-1.625)     |
| <b>Bedouin origin</b>   | 0.999 (0.886-1.127)     |

\*Neonatal distress: accounts for all neonates with RDS, IVH, NEC, TTB.
