# Supplementary material
Source: publisher figshare collection journal article supplement (https://tandf.figshare.com/articles/dataset/_/6632903)
Supplement: Supplementary file 2 [file 2]

Archive with 4 entries (4 files):
- ijmf_a_1462325_sm2948.pdf
- ijmf_a_1462325_sm2947.pdf
- ijmf_a_1462325_sm9928.tif
- ijmf_a_1462325_sm9927.tif
