# Supplementary material
Source: publisher figshare collection journal article supplement (https://tandf.figshare.com/articles/dataset/_/6632903)

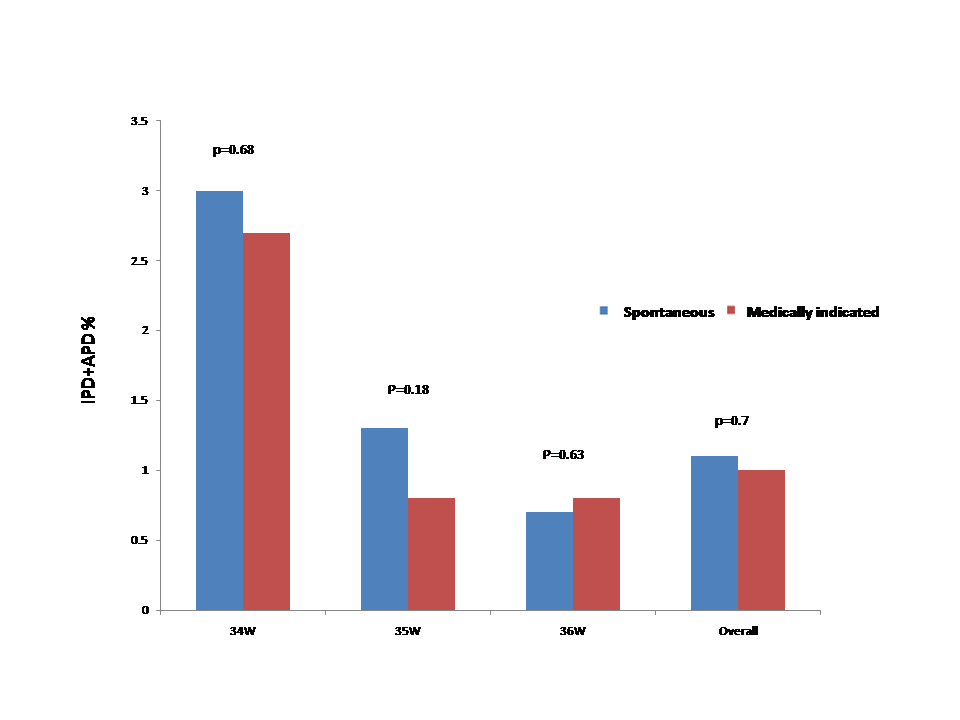

Supplement: Supplementary file 2 [file 2 › ijmf_a_1462325_sm9928.tif]

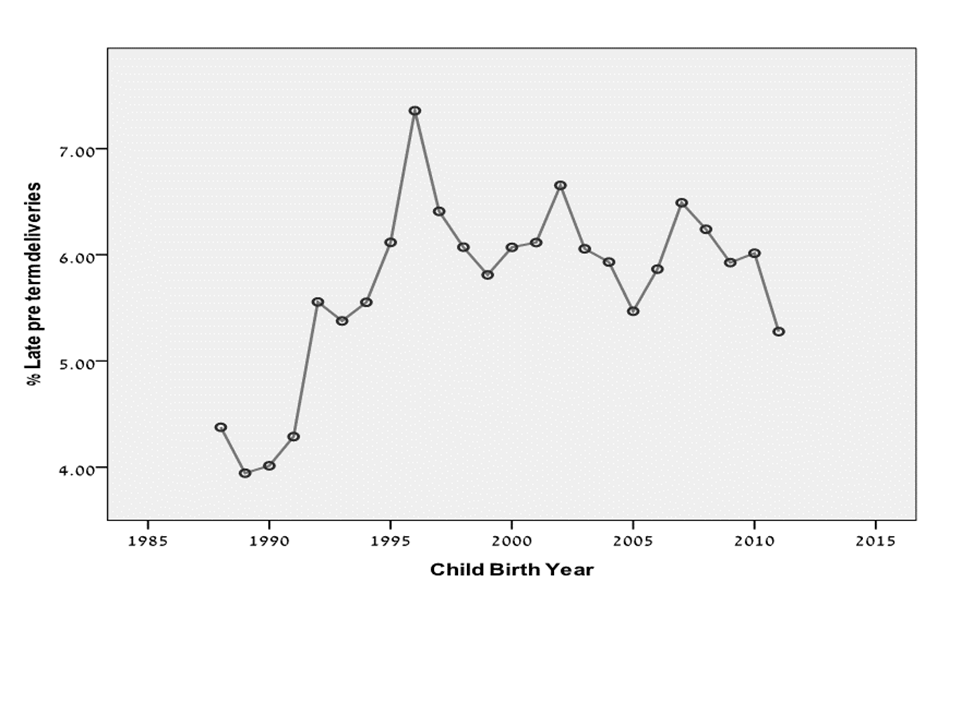

Supplement: Supplementary file 2 [file 2 › ijmf_a_1462325_sm9927.tif]
